# Supplementary material
Source: ML conference proceedings conference paper supplement (https://openreview.net/forum?id=SSBzCDUiqg9)

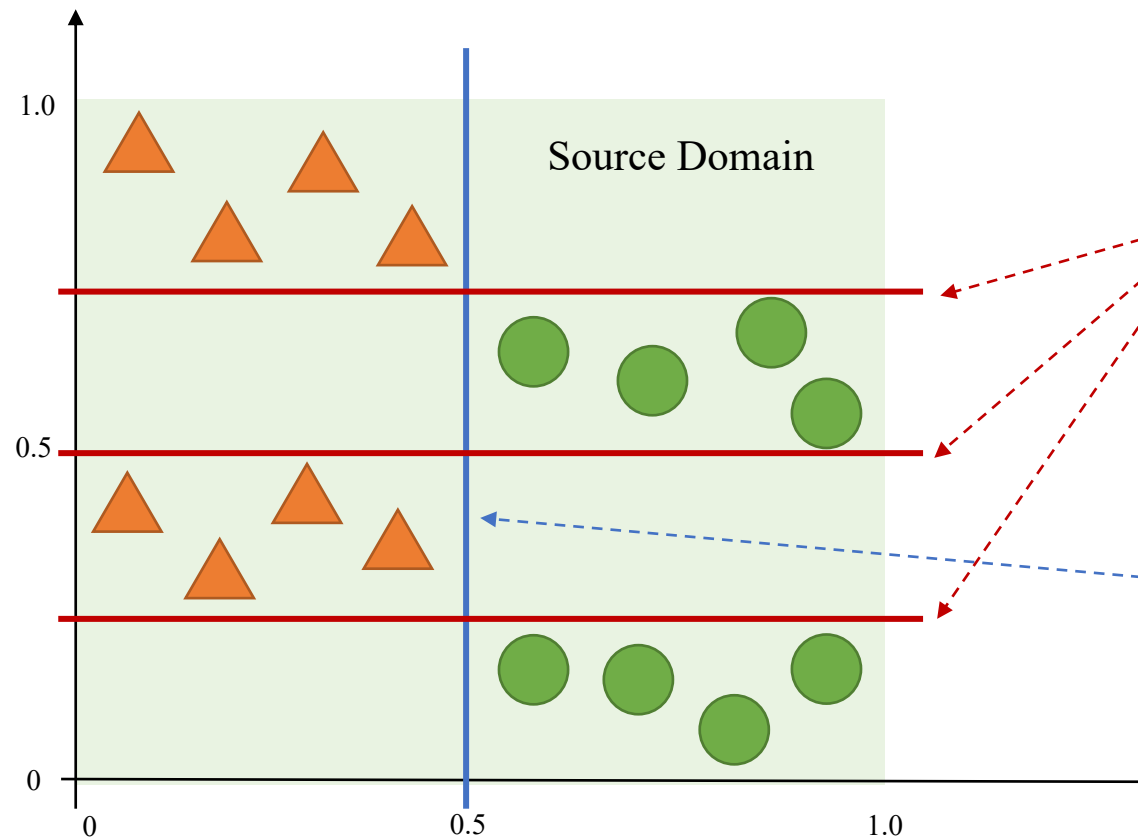

shape labeling function, this function will predict the shape correctly over target domain data.

color labeling function, this function will not predict the shape correctly over target domain data, even though its predictions coincide with the one of the shape labeling function in this distribution

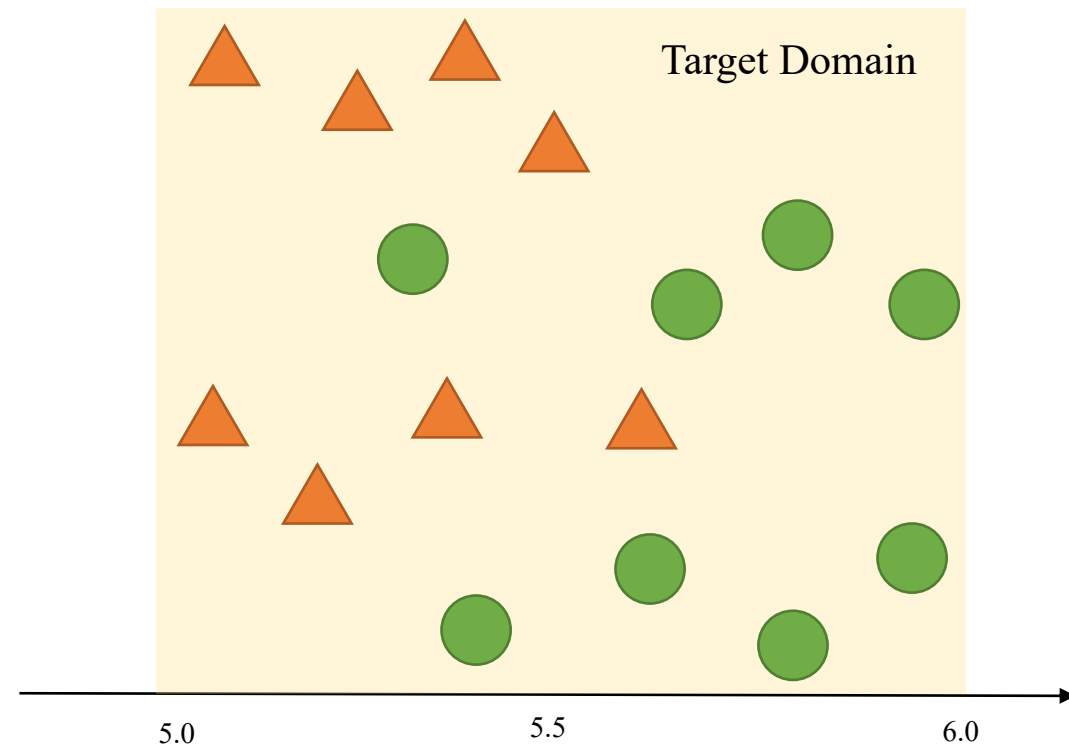

Supplement: supplementary_material [file attachment]
